# Supplementary material
Source: PubMed Central journal article supplement (PMC3147806)
Supplement: supp_31_16_3267__1.pdf [file supp_31_16_3267__1.pdf]

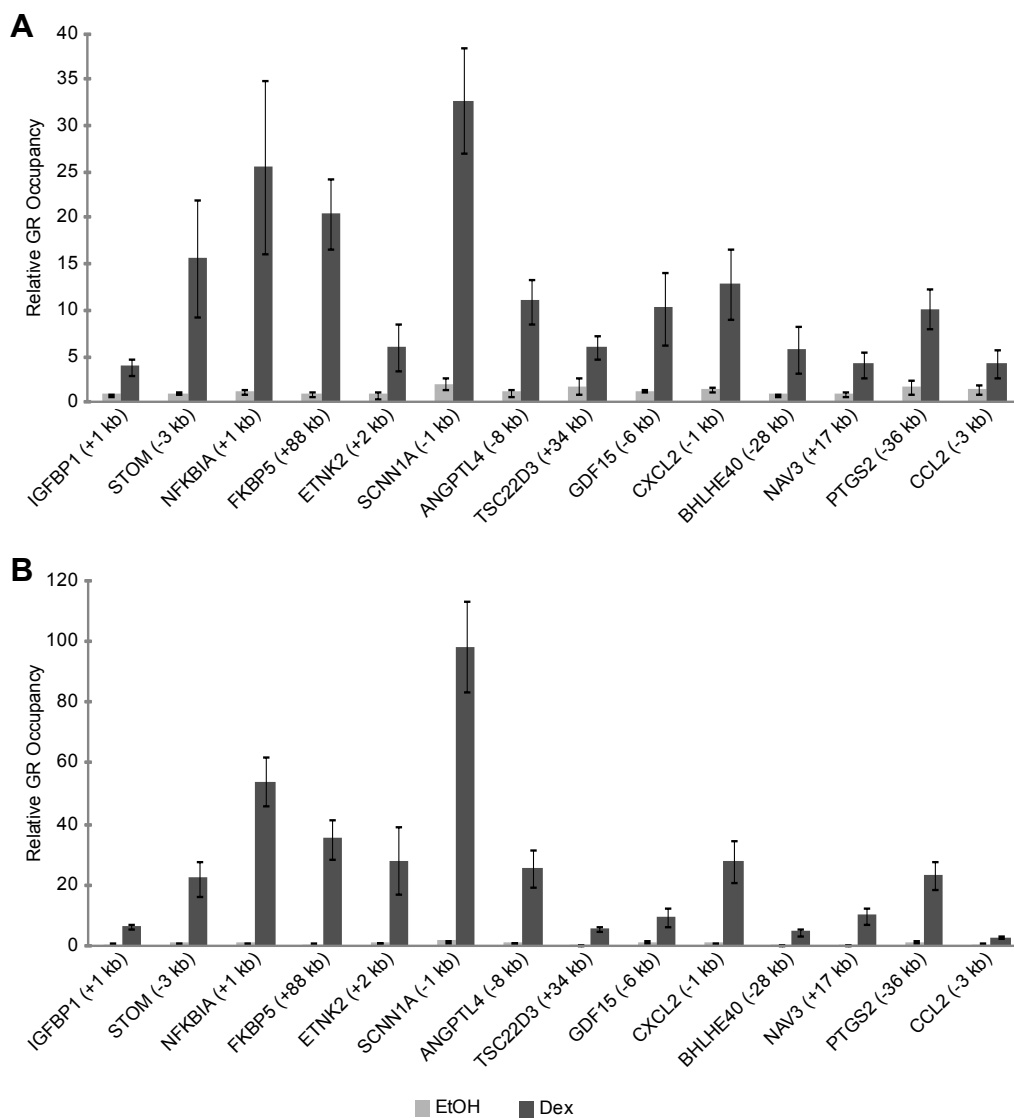

FIG. S1. Similar patterns of GR occupancy following 30 min (A) or 4 h (B) dex treatment. Cells were treated with EtOH or 100 nm dex. ChIP data is displayed as enrichment of GBRs near the corresponding gene relative to IgG  $\pm$  SEM ( $n \geq 3$ ). The location of the GBR relative to the TSS is indicated.

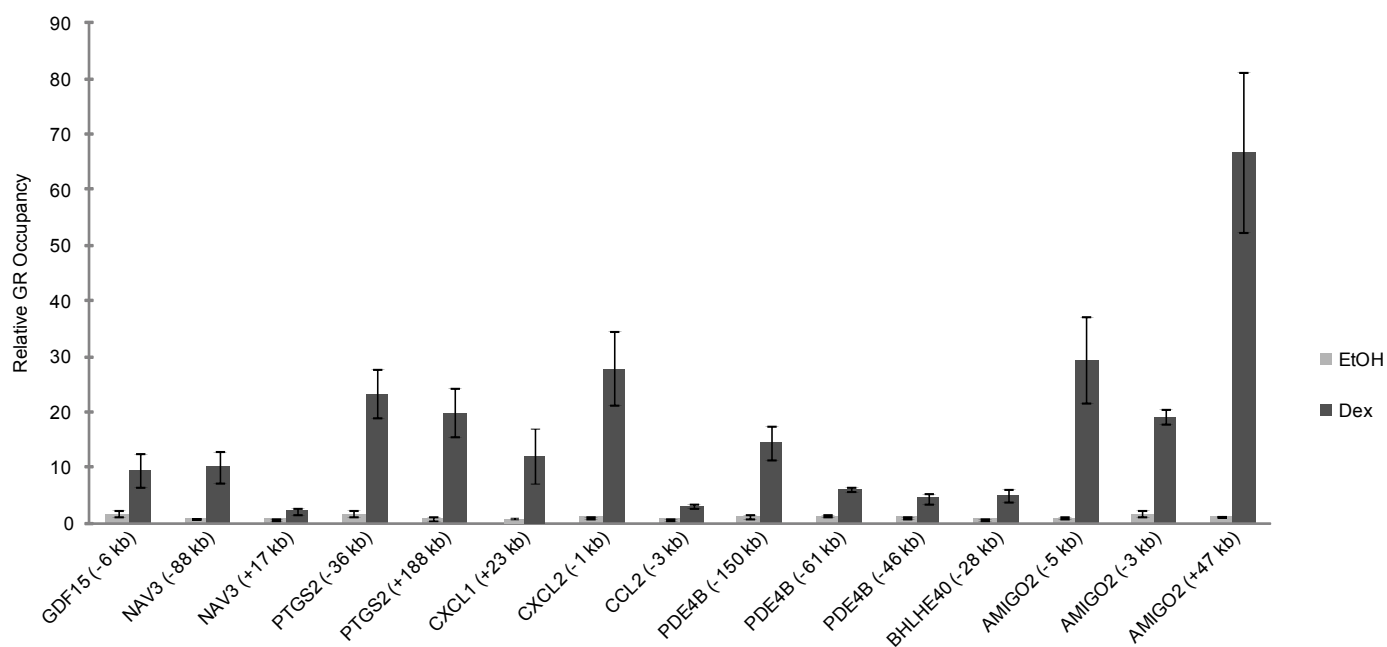

FIG. S2. GR occupancy at all verified GBRs of repressed genes. Cells were treated with EtOH or 100 nM dex for 4 hours. ChIP data is displayed as enrichment of GBRs near the corresponding gene relative to IgG  $\pm$  SEM (n = 4). The location of the GBR relative to the TSS is indicated.

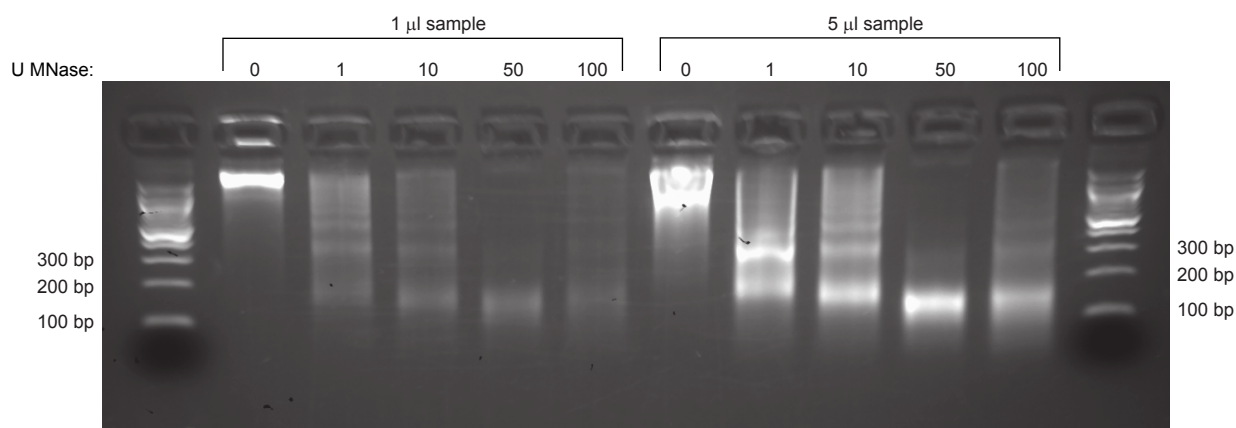

FIG. S3. MNase titration to achieve mononucleosome-sized DNA fragments. After adjusting nuclear suspensions to 3 mM  $\text{CaCl}_2$ , the sample was split into five 200  $\mu\text{l}$  reactions, which were digested with a titration from 0 to 100 U MNase for 10 min at 37°C. After eluting purified DNA, 1 or 5  $\mu\text{l}$  was run on a 2.5% agarose gel. Digestion to mononucleosome-sized DNA fragments was achieved with 50 U MNase.

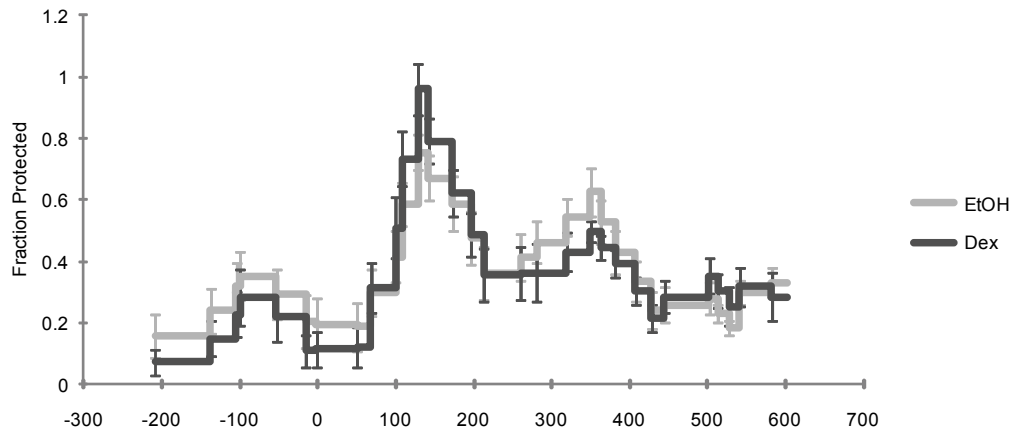

FIG. S4. Housekeeping gene RPL19 shows no chromatin changes upon hormone treatment, as a negative control for the MNase assay. Cells were treated with EtOH or 100 nM dex for 10 min. Data is displayed as fraction of MNase protection by calculating a fold difference between MNase-treated and untreated samples (y-axis), plotted against the location relative to the TSS (x-axis)  $\pm$  SEM (n = 3).

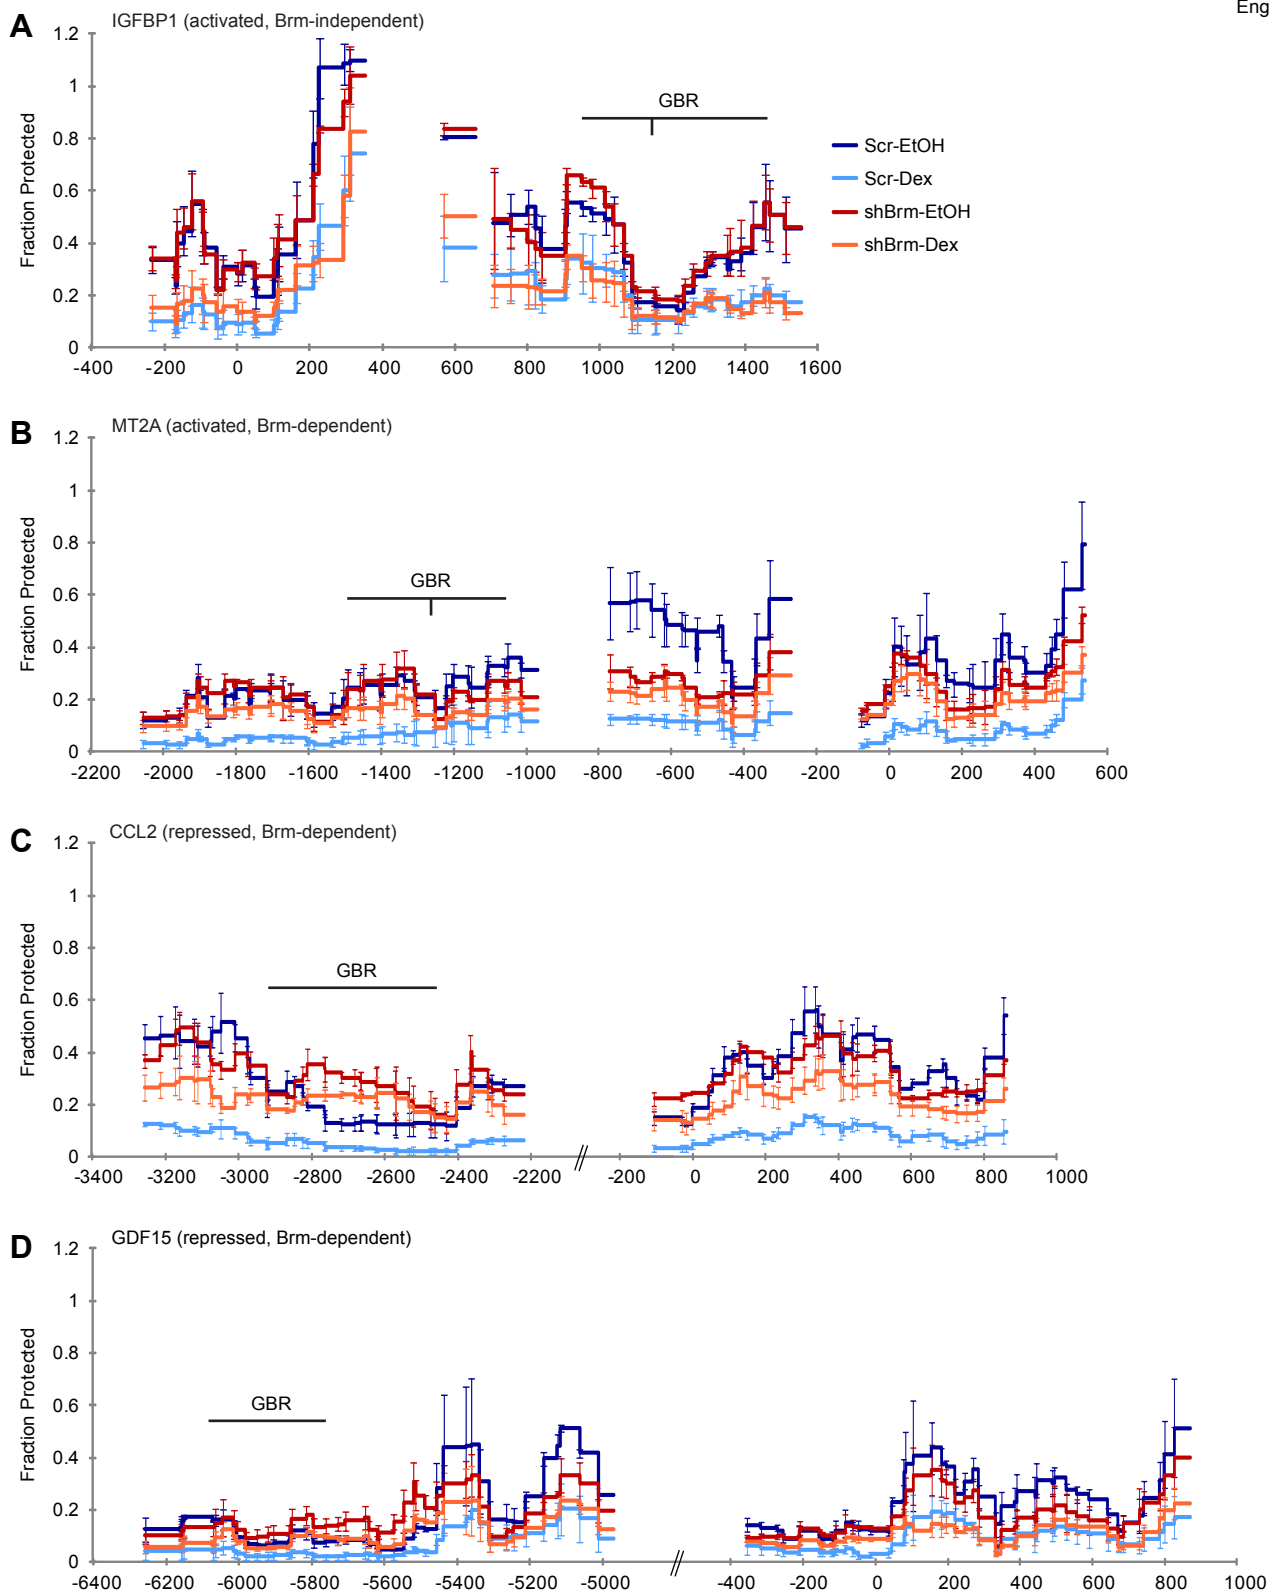

FIG. S5. MNase assay showing fraction protected with error bars at IGFBP1 (A), MT2A (B), CCL2 (C), and GDF15 (D). Cells were treated with EtOH or 100 nM dex for 10 min. Data is displayed as fraction of MNase protection by calculating a fold difference between MNase-treated and untreated samples (y-axis), plotted against the location relative to the TSS (x-axis)  $\pm$  SEM (n = 3). The horizontal line with GBR written above it represents the region of GR binding, and the vertical line shows the location of the canonical GR binding motif. The motif is not present at CCL2 or GDF15.

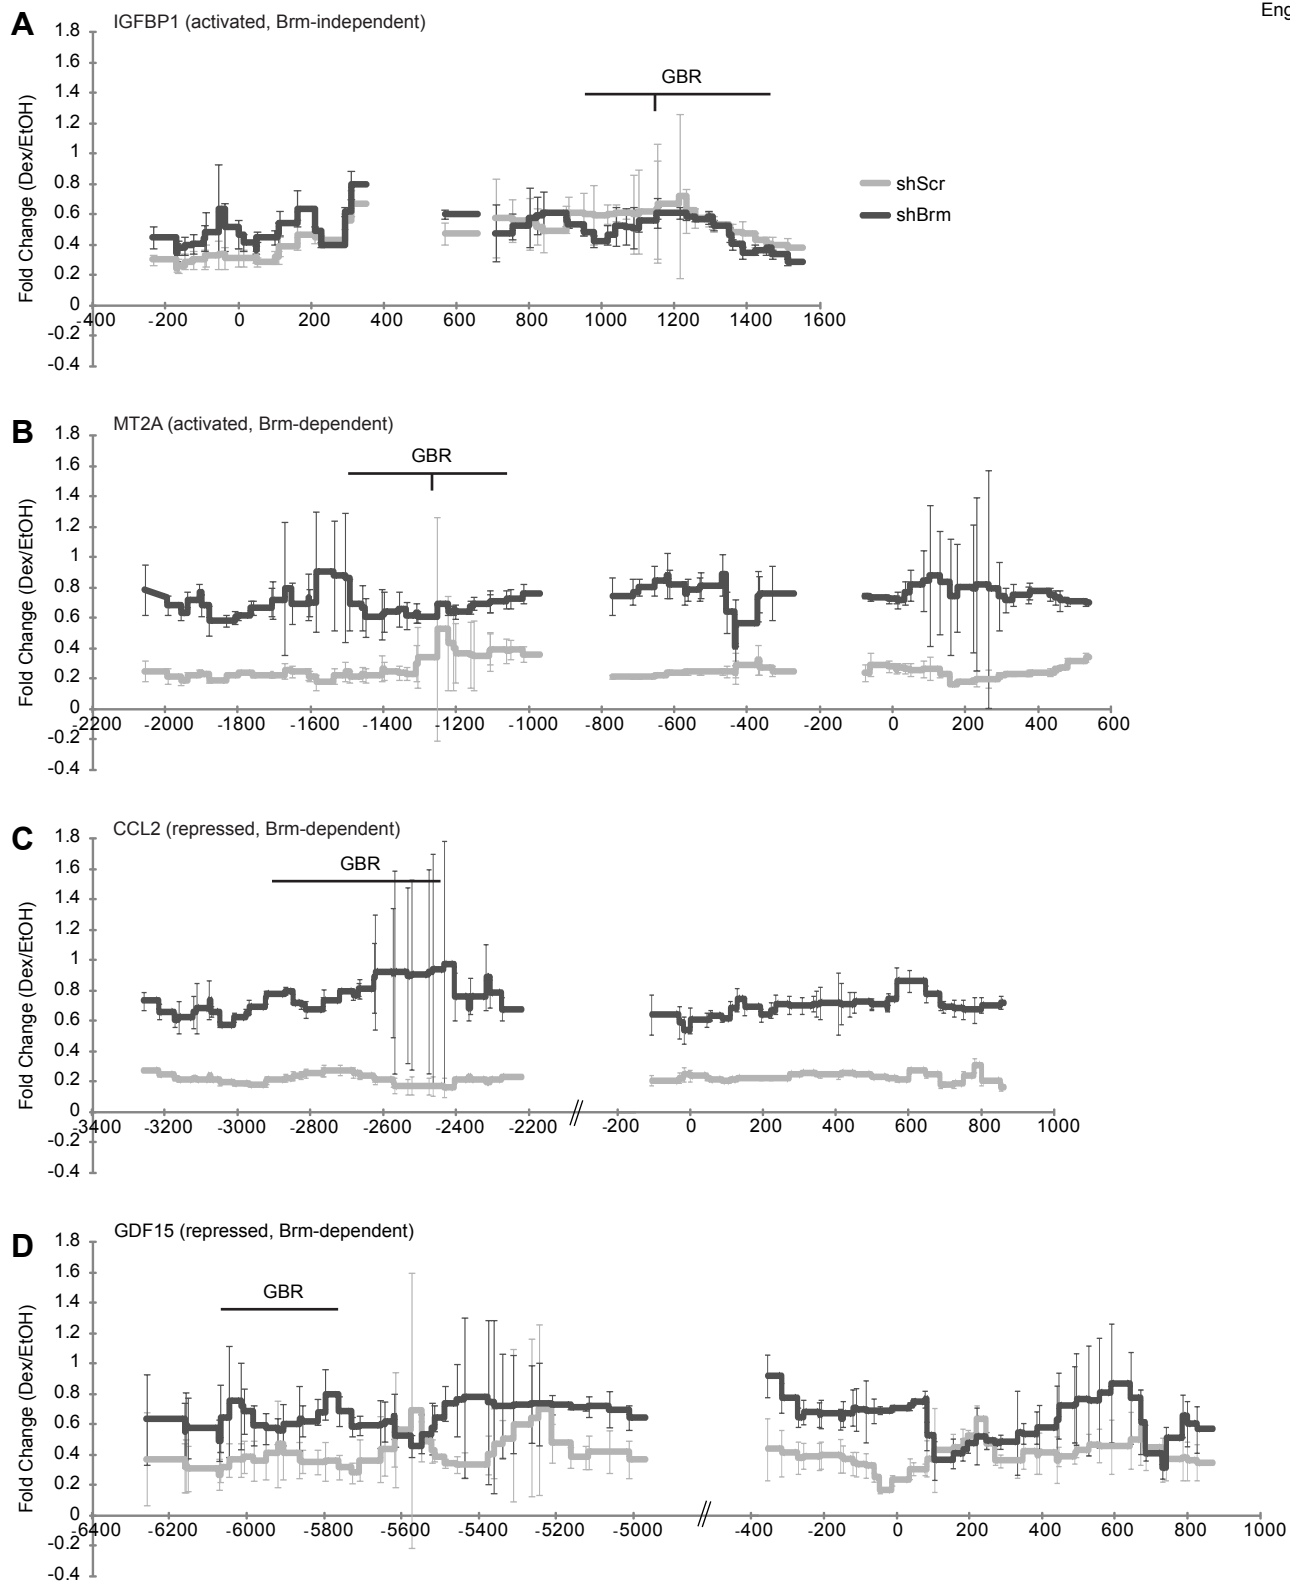

FIG. S6. Fold change of MNase protection with error propagation at IGFBP1 (A), MT2A (B), CCL2 (C), and GDF15 (D). Data is displayed as the fold difference between dex- and EtOH-treated MNase samples (y-axis), plotted against the location relative to the TSS (x-axis)  $\pm$  variance ( $n = 3$ ). The horizontal line with GBR written above it represents the region of GR binding, and the vertical line shows the location of the canonical GR binding motif. The motif is not present at CCL2 or GDF15.

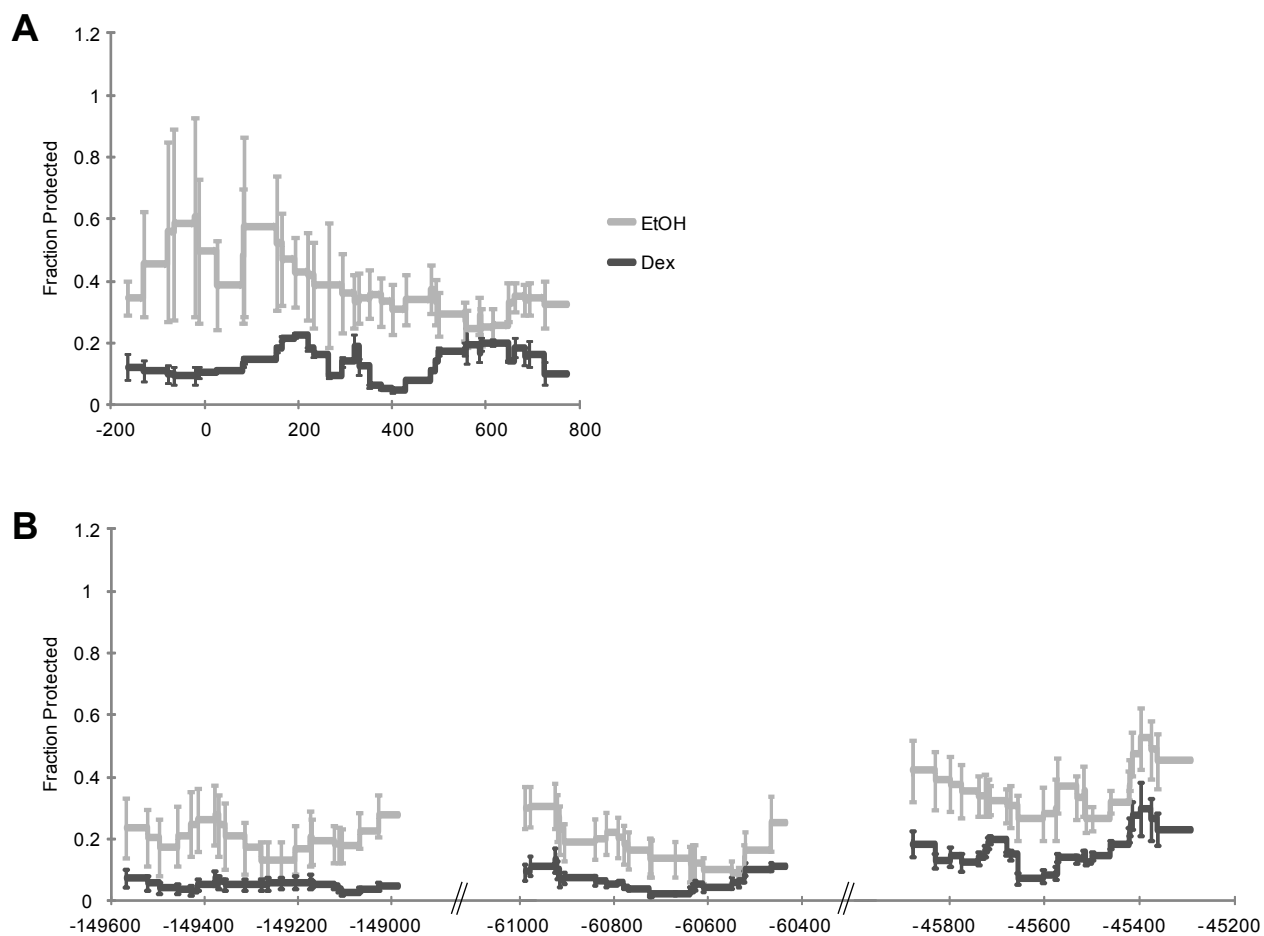

FIG. S7. Chromatin becomes more accessible upon dex treatment at another GR-regulated gene. (A-B) MNase assay showing fraction protected around PDE4B TSS (A) and GBR regions (B). Cells were treated with EtOH or 100 nM dex for 10 min. Data is displayed as fraction of MNase protection by calculating a fold difference between MNase-treated and untreated samples (y-axis), plotted against the location relative to the TSS (x-axis)  $\pm$  SEM (n = 3).

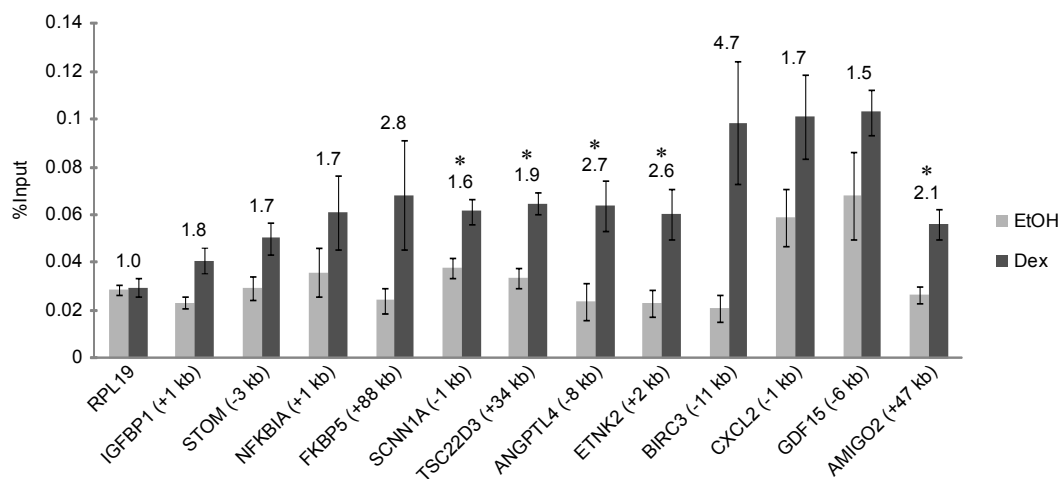

FIG. S8. Brg1 occupies a subset of GBRs in a dex-stimulated manner. Cells were treated with EtOH or 100 nM dex for 2 hours. Data is displayed as enrichment of GBRs near the corresponding gene normalized to input samples  $\pm$  SEM (n = 3). The location of the GBR relative to the TSS is indicated. Fold change is displayed above the bar graphs. \*,  $P \leq 0.05$  by Welch's t-test.



**Table S1.** Primers used for qPCR analysis of cDNA sequences

| <b>Gene Symbol:</b> | <b>Gene ID:</b> | <b>Forward Primer:</b>   | <b>Reverse Primer:</b> |
|---------------------|-----------------|--------------------------|------------------------|
| AMIGO2              | 347902          | catgcccctgcaagtgtaa      | tcaggggttccaaaaacacc   |
| ANGPTL4             | 51129           | tcagcatctgcaaagccagt     | tctcccaacctggaacag     |
| BHLHE40             | 100172646       | tgaaggccatttcactagcag    | gtagaagggcaggcagaaag   |
| BIRC3               | 330             | gacaggagttcatccgtcaag    | tccacggcagcattaatc     |
| CCL2                | 6347            | gctcatagcagccacctca      | ctggccacaatggtctga     |
| CXCL1               | 2919            | cagaccctgcaggaattc       | tggtatgacttcggtttg     |
| CXCL2               | 2920            | gcaggaattcacctcaaga      | gacaagctttctgccattc    |
| ETNK2               | 55224           | ctactgcaccttcagaatgg     | ccgtggcgtggatagatg     |
| FKBP5               | 2289            | aggctgcaagactgcagatc     | ctgcccattgctttattgg    |
| GDF15               | 9518            | ctattcaaaagaccgacacc     | agtggaaggaccaggactgc   |
| IGFBP1              | 3484            | tcacagcagacagtgtgagac    | agaccagggatcctcttc     |
| MT2A                | 4502            | gcaaatgcaaagagtgcaa      | atccaggttgtggaagtcg    |
| NAV3                | 89795           | ttccaacgtcagcagcaagt     | gattgggggaacctgacaa    |
| NFKBIA              | 4792            | cacctccactccatcctgaag    | atcagcaccaaggacacc     |
| PDE4B               | 5142            | tcatgcttttctttattcacctca | gcacaaatgtgatgaccaa    |
| PTGS2               | 5743            | cgcaaacgctttatgctgaa     | ggcttccagtaggcaggaga   |
| RPL19               | 6143            | atcgatcgccacatgtatca     | gcgtgcttcttggcttag     |
| SCNN1A              | 6337            | aacggctctgtccctgatgct    | ttggcgagtcgccataatc    |
| SMARCA2 (Brm)       | 6595            | tttatgcgatggacatgga      | tagccactgcttctccgtga   |
| SMARCA4 (Brg1)      | 6597            | aggccggcagaagaaatca      | gtgagggtgggtgggttagg   |
| STOM                | 2040            | cagacactgaccaccattgc     | ttcatgcttgaaggctagc    |
| TSC22D3             | 1831            | agatcgaacaggccatggat     | ttacaccgcagaaccaccag   |

**Table S2.** Primers used for qPCR analysis of ChIP samples

| <b>GBR Symbol:</b> | <b>Forward Primer:</b> | <b>Reverse Primer:</b> |
|--------------------|------------------------|------------------------|
| AMIGO2 (-5 kb)     | ccctggggtttgtttctca    | gaagtagcaatgggactgacg  |
| AMIGO2 (-3 kb)     | gggtgtggtcatgtgagtg    | cagggctagaactcctgtga   |
| AMIGO2 (+47 kb)    | cacagcctctttcacaacca   | ggaaccagtgaggaatggaa   |
| ANGPTL4 (-8 kb)    | tctgccctgcaatgtacaag   | ccaagagcaggacctcaaac   |
| BHLHE40 (-28 kb)   | tctccgtgcagtctctcctc   | cggtgggagggacattaataag |
| BIRC3 (-11 kb)     | accccaaataatgggtgaaa   | agggtacgcggagtacagag   |
| CCL2 (-3 kb)       | acttctctcacgccagcact   | tagctgtctgcctcccactt   |
| CXCL1 (+23 kb)     | tcacttcagctatttcccaca  | aacaaactgggctattcaca   |
| CXCL2 (-1 kb)      | tagggcaagaactgcagcat   | ccaggaaggagacaaaagctc  |
| ETNK2 (+2 kb)      | agtgaatgggattggcagt    | aaggggtagagcagagcaca   |
| FKBP5 (+88 kb)     | taaccacatcaagcgagctg   | gcatggttaggggttcttg    |
| GDF15 (-6 kb)      | tgtgcctctccaaatctcc    | cccaatctccaaaatctcc    |
| HSP70              | tctggagagtctgagcagg    | cccttctgagccaatcaccg   |
| IGFBP1 (+1 kb)     | ctcatctggactgcttgac    | cagagaatccgcaggaaatc   |
| MT2A (-1 kb)       | gacgattcggctgagctaga   | agggccttagatcgtaacc    |
| NAV3 (-88 kb)      | tggcactattgggagtccag   | gggtcacgtgatgtttaagc   |
| NAV3 (+17 kb)      | atgtcttgccacctggattc   | acaacaggaagcaccctctg   |
| NFKBIA (+1 kb)     | ccatggtcagtccttttct    | gccaggaacactcagctcat   |
| PDE4B (-150 kb)    | aggggtctagtaaacctgcaca | aaggctataacagccacctttt |
| PDE4B (-61 kb)     | ctgaacagttgagtcctgtcc  | gcatgattccaacttcaagg   |
| PDE4B (-46 kb)     | ggcagaaacatagcctgtgg   | gtttgtttggggaatgtgg    |
| PTGS2 (-36 kb)     | acacaatgctgtgtatttccat | gaagctggcttcaaagttaatg |
| PTGS2 (+188 kb)    | ttgccaatgtgatccgaata   | cccaaatcctttgtctcacc   |
| RPL19              | ctttctgctggcacacc      | gatcacctctctcggcagtc   |
| SCNN1A (-1 kb)     | aggccaggaatgtgtaatcg   | caccttcagtcctgctttc    |
| STOM (-3 kb)       | gaacaggctccagtggtga    | agtgactgcacaagctgcac   |
| TSC22D3 (+34 kb)   | gtgcctggagaccaactcat   | acccttgatgctgagcaagt   |

**Table S3.** Primers used for qPCR analysis of MNase samples.

| <b>Primer Name:</b> | <b>Forward Primer:</b>      | <b>Reverse Primer:</b>     |
|---------------------|-----------------------------|----------------------------|
| CCL2 #1             | gggctctattctacctggagg       | ccgtagctctgcactcacc        |
| CCL2 #2             | gtgggggtgtctagaagg          | cccacctagtgaggctc          |
| CCL2 #3             | ttgaaggctgagtgaagg          | ggctcccaccaacttctg         |
| CCL2 #4             | actaggtgggagggacaag         | tctctggaaagatctgaagcc      |
| CCL2 #5             | agtggcttcagatctttccag       | atcctctgcatgaaccttg        |
| CCL2 #6             | gagtgggagctgcagcg           | aataatgctttcttctcctcc      |
| CCL2 #7             | gcagaggatcttagtgggtgg       | ggggcctcctctctatcaac       |
| CCL2 #8             | ccaagaggagctttccattc        | ctatggggaaaatgagggtc       |
| CCL2 #9             | acagcatcagagcattgacc        | gggttgactctcgctg           |
| CCL2 #10            | atttcccatagcccctc           | gggaacatctcggcacaag        |
| CCL2 #11            | ccaggtttgtccagagc           | ctgcattccagatactgggc       |
| CCL2 #12            | ccagtatctggaatgcaggc        | gaagtcccagatcccgtag        |
| CCL2 #13            | gcaggctccagccaaatg          | gtgctggcgtgagagaag         |
| CCL2 #14            | cttccaaagctgcctctc          | gtcaagaaaagatgccctcc       |
| CCL2 #15            | agcactgacctcccagcg          | ggtgaagggtatgaatcagaaaag   |
| CCL2 #16            | gggaggcagacagctatcac        | ttgcatatatcagacagtaaacacag |
| CCL2 #17            | catacccttcaccttccctg        | cttctgagtgttgaagcatgtc     |
| CCL2 #18            | tccttctgaagtagagacatgc      | gtcacagagaaaaacttcccag     |
| CCL2 #19            | gtgaacactcagccagcaaag       | tctgataaagccacaatccag      |
| CCL2 #20            | ttggtctccttctctggattg       | gaatcccagaatcaatgggc       |
| CCL2 #21            | tcagcagatttaacagcccac       | ttattgaaagcgggcagag        |
| CCL2 #22            | ccgctttcaataagaggcag        | gcttcagttgagaattggatg      |
| CCL2 #23            | cagaggaaccgagaggctg         | cagagactttcatgctggagg      |
| CCL2 #24            | caaactgaagctcgcactctc       | gaatgaaggctgctatg          |
| CCL2 #25            | catagcagccaccttattc         | gagagaagacaatgtggtcaag     |
| CCL2 #26            | ggtaaggcccccttcttctc        | ctgtgggtaccacgtctgc        |
| CCL2 #27            | acgtgtaccacagctctgc         | gctgtgtggtgggctcac         |
| CCL2 #28            | cagaaaaggacaaggggtgag       | ggattggggttcacagc          |
| CCL2 #29            | cagctgtgaaccccaaatc         | ggagtaactgcgctgagtgtg      |
| CCL2 #30            | aaccccaaatccagctcc          | ctgatcccaaatctgctg         |
| CCL2 #31            | gctccagcagagttggg           | agattctgggtctccagcg        |
| CCL2 #32            | gaggggtgggtgtgaggctg        | gagtcaccgtctctggaagc       |
| CCL2 #33            | ctggtctctgcttattcacc        | tttccctgatactattacctctg    |
| CCL2 #34            | gcagaggtaatgagtatcagg       | tcagcaccaggggaagatcag      |
| CCL2 #35            | aggaggctcatagtggggc         | gcctacaagtgtcattaagacgg    |
| CCL2 #36            | atcatctggattattgtccg        | ggacagagagaaggaggagc       |
| CCL2 #37            | gctttaacagctcctctctctc      | ctttgaccaatgactcagttc      |
| CCL2 #38            | cagcataggaactgagtcattg      | aggcaggcaggagaagac         |
| CCL2 #39            | gtataggcagaagcactggg        | aaaaagcaaaaggcaggcag       |
| GDF15 #1            | tcgaaaataaaaacataaaaagagtgg | ctgagttcaaacgatccttcc      |
| GDF15 #2            | actcagccggttgagaccag        | cccgggtctttttgtttc         |
| GDF15 #3            | aactcagccggttgagacc         | gtgccatctagggggttcc        |
| GDF15 #4            | ctgcggaaccccctagat          | tcatgctcgtgactgtctc        |
| GDF15 #5            | ctgcggaaccccctagatg         | ccgaggacaagaagaaatgc       |
| GDF15 #6            | cgagcatgagacagcatttc        | gggtcataggaggagattgg       |
| GDF15 #7            | tgtgcctcttccaaatctcc        | ggcactcacgaacacaaacc       |
| GDF15 #8            | cacaagaacaatcaataaaagtgg    | cccctccactaccagctctc       |

|            |                        |                           |
|------------|------------------------|---------------------------|
| GDF15 #9   | ttgacaaaggcgttgataactg | ccaatctcccaaaatctcc       |
| GDF15 #10  | gggagatTTGGGagattgg    | ggagctgggatggaagtaaac     |
| GDF15 #11  | ggcccctgtgctctgtttac   | caggTggccacagatgagc       |
| GDF15 #12  | aagctgtcggTgaggaacac   | ggccaagctgagaggagag       |
| GDF15 #13  | ccccatctctcctctcagc    | tgctccccaaatctttaacc      |
| GDF15 #14  | gaggcgggctatgaggTc     | gtgctgggatcctgtgatg       |
| GDF15 #15  | ggctcatgccatcacagg     | agctcaagcatcctccttcc      |
| GDF15 #16  | aggacaaggaaggaggatgc   | ttgtagagacgggggtcttg      |
| GDF15 #17  | gcaagacccccgtctctac    | agggatcctgtcacctcaac      |
| GDF15 #18  | aggTgacaggatcccttgag   | agggtttggctctgttacc       |
| GDF15 #19  | gcagTgagTgggtaacagagc  | ggaatgTgagaagcaggac       |
| GDF15 #20  | gtcctgtctctcaccattcc   | gagctgtgattacgcttctgc     |
| GDF15 #21  | agggtctgtcagTtgctc     | gccaagctggtagTcttttg      |
| GDF15 #22  | cactgcagccttgatctcc    | ggaatcctctgCctctgg        |
| GDF15 #23  | ggggactcatgcctataacc   | agatagggtctcactgtgttg     |
| GDF15 #24  | ctgagccaaggagTtcgag    | gggcaacgagagctaaattc      |
| GDF15 #25  | ctttgacccaaccaaag      | tgtgaaaaattccagacaagag    |
| GDF15 #26  | gggcatagacagccacctc    | tcgatatgaggacaccattcc     |
| GDF15 #27  | ttttctccaaaagactcc     | gggggcgctcctagtaaag       |
| GDF15 #28  | tcgaggaagaggatactgagg  | gtctgggggtgtatttaggg      |
| GDF15 #29  | gatcctccccctaaatacacc  | gcagagtaaactccaatgacc     |
| GDF15 #30  | gctgtggtcattggagTgttac | tctccgcctgctcagTcc        |
| GDF15 #31  | gactgagcaggcggagac     | gcatggctgtgcaggttg        |
| GDF15 #32  | ggcagcatctggtcagTc     | ggagcatctgagagccattc      |
| GDF15 #33  | gaactcaggacggtgaatgg   | cagccacgagagcaccag        |
| GDF15 #34  | gttgctggtgctctcgtg     | ctcggaatctggagTctcg       |
| GDF15 #35  | gggaccctcagagTtgac     | aggTcctcgtagcgtttcc       |
| GDF15 #36  | ctccagattccgagagTtg    | ggTcggTgtcgaatctcc        |
| GDF15 #37  | agctgggaagattcgaacac   | gggatctctaagattcacttacctc |
| GDF15 #38  | gcagTccggatactcacg     | tgggctttcaagatgagg        |
| GDF15 #39  | cagccccatataatcagg     | tattctaccagggcacag        |
| GDF15 #40  | aagcccagacctaccttgag   | gttgTgggtgcaaatcagg       |
| GDF15 #41  | gatcccctgggtctgatg     | tttgcaactggggacag         |
| GDF15 #42  | ccacaacgtgggaggTta     | gtttcccaggTgctgtgc        |
| GDF15 #43  | ggaccctcctgaatgtgc     | acccccattgtttctcttg       |
| GDF15 #44  | ggccaggatccaagagaaac   | cagattcagaaccagctccag     |
| GDF15 #45  | agaagTttgtgatgggcagag  | cctaacaagTcgcTcgttg       |
| GDF15 #46  | ttgtcaaggcactgctaaagTc | catggagggcacagagatg       |
| GDF15 #47  | tattttcccatctctgtgc    | accacagcccagacctcatc      |
| IGFBP1 #1  | ttttgcaggagacgctttg    | ggccaggctcttaattgac       |
| IGFBP1 #2  | ttttgcaggagacgctttg    | ggggatgacgtttgttttg       |
| IGFBP1 #3  | ctggacctgggctgtcttt    | taaagtccagTtctaacaagTgct  |
| IGFBP1 #4  | tgacaaaaacaaacgtcatcc  | tgTttgtcccgtTgttaggg      |
| IGFBP1 #5  | tttaactgagggcctgaacc   | tttgctagTgcacccaagg       |
| IGFBP1 #6  | gtttaccctcctcccaccag   | cacgctaggagctgagTgttc     |
| IGFBP1 #7  | ggTgcactagcaaaacaaact  | cacTtataaagggcacagg       |
| IGFBP1 #8  | gcgctgccaatcattaacc    | cagatgctcgcTggatgg        |
| IGFBP1 #9  | tataaggTgcgctgtgtc     | cagatgctcgcTggatgg        |
| IGFBP1 #10 | gctgtgtccagcgagcat     | actctgggcaagTgatggTg      |
| IGFBP1 #11 | ccatcactgcccagagTtt    | aacggggacctctgacatct      |

|            |                         |                            |
|------------|-------------------------|----------------------------|
| IGFBP1 #12 | gatgtcagaggtccccgttg    | acctggacagtcagcaggag       |
| IGFBP1 #13 | acctctgcacgccctcac      | gcgggactgtggtacctg         |
| IGFBP1 #14 | cccactcccctaactactg     | aagctcctccccaaactacg       |
| IGFBP1 #15 | tccacaactagagcttgaacc   | caagaccgtgcaatgagc         |
| IGFBP1 #16 | ctcattgcacgggtcttg      | cctccttgagtctccactaagc     |
| IGFBP1 #17 | aggaggaagctcccactg      | accgcctccctctactcttg       |
| IGFBP1 #18 | cccagacagcaagagtagagg   | gtgctggcaaggagactgg        |
| IGFBP1 #19 | cccaccagtcctctg         | attccctcttaggccttc         |
| IGFBP1 #20 | cggaaggcctaagaagg       | ctgtatccaggacgtatattacaagg |
| IGFBP1 #21 | ctccccaggaggtgttg       | tggaagtgaagcttttagcc       |
| IGFBP1 #22 | tgtgctcccagatgtttacag   | ggggcaacatacacatcaaac      |
| IGFBP1 #23 | acaatgtttgatgtatgttg    | aaacaaatgcctgcttaaatcc     |
| IGFBP1 #24 | taagcaggcattgttttagc    | gggctggagtagagaaagagg      |
| IGFBP1 #25 | tgttttagcgggaagtgg      | aggacaggacgtgcaagc         |
| IGFBP1 #26 | cctcatctggactgcttg      | ctctcacactcactctaacc       |
| IGFBP1 #27 | ccctgataggggttagagtgg   | ctctgaagggcagagaatcc       |
| IGFBP1 #28 | aaggaggaacaggatttc      | tccatctcctgaggatcag        |
| MT2A #1    | ttgccttgagtgcataagtg    | cagtgaccatatttgtgtg        |
| MT2A #2    | gtgcatacataaataacaacaaa | ttgaaatctcatgatgtctgg      |
| MT2A #3    | ccacagagctgccagacat     | catcctctgattttagagccaag    |
| MT2A #4    | ttggctctaaaatcagaggatg  | caattacatgcctggactctc      |
| MT2A #5    | aaccagggatcagaagagtcc   | cactcggccactcacttactc      |
| MT2A #6    | catgtaattgccccaaagtc    | ttgtaaaacaccgcacagg        |
| MT2A #7    | tgaatttagtccatctgagagc  | cctctgaccaccctggaac        |
| MT2A #8    | aagagtgagcagcaggttc     | cctggactgctctcccttc        |
| MT2A #9    | gtcggcctcatacaagggtg    | gaattcatggggtaatgg         |
| MT2A #10   | aggccattacccccatgaat    | tgtctgcctctggaattg         |
| MT2A #11   | ggaagctgaagacacaattcc   | gtgtctgccccctctcac         |
| MT2A #12   | tggcattccagtggtcag      | ctttccgtgcctgtggtatg       |
| MT2A #13   | ggcagagacaccaatccaag    | ctgtggaaggctgtggtaaac      |
| MT2A #14   | ggaggggaaagaacaggatg    | cgaatcgtcacttcctctgg       |
| MT2A #15   | aggacaggggtcccagag      | tgtcctgcagcccttac          |
| MT2A #16   | gattcggctgagctagaaagac  | ccgattgccacagtgaag         |
| MT2A #17   | aaactttcactgtggcaatcg   | ggagttaggaagtgggtactgg     |
| MT2A #18   | caatcggcattccctaagc     | agggccttagatcgtcaacc       |
| MT2A #19   | cctgactcctagcatgacacac  | cctgtctggagaggcacatc       |
| MT2A #20   | ccttacacagcgccagacac    | gaggctgaggggaagagc         |
| MT2A #21   | ctccagacaggaatgtggac    | gacatttgaagggaaaaacc       |
| MT2A #22   | cttactcttctccttggtg     | caggggtgaatgagaccag        |
| MT2A #23   | ctggtcgcattcacctg       | tctcattgtagagaggagaaactgc  |
| MT2A #24   | tctctggacctgcagttctc    | gatgcacttaattctgtagcaacc   |
| MT2A #25   | ggagagtcttatctatgggtg   | tttagcgtgtaacaggactgtag    |
| MT2A #26   | acaacacacttctacagtccc   | agcatcacagtaaaccctg        |
| MT2A #27   | aaaagtactcaacatgcaacgg  | tacaactctgtagcagccaagg     |
| MT2A #28   | aagcctggctgctacagag     | ggtgaaagcgggacttg          |
| MT2A #29   | cctgtctgcacttccaacc     | tccctcctgtcctgtactcg       |
| MT2A #30   | cgctaacggctcaggttc      | cacagtgtaccgggtgctg        |
| MT2A #31   | ggggctttgcactcgtc       | gttcgctgggacttgag          |
| MT2A #32   | cgctccggctcttctagc      | gctgggactggaggagg          |
| MT2A #33   | acgcctcctccaagtccc      | aagagggcggctagagtccg       |

|           |                             |                             |
|-----------|-----------------------------|-----------------------------|
| MT2A #34  | actctagccgcctcttcagc        | atccccagcctcttaccg          |
| MT2A #35  | cggtaagaggctggggatg         | cagagaaagaaagaggggtcag      |
| MT2A #36  | gcaatttctgaccctcttcc        | aacctagaatggagagaaagatacc   |
| MT2A #37  | ggagttgctcctcccaaag         | agatctccttaacggtaaaaagg     |
| MT2A #38  | cattctaggttattcggagccc      | ctcagtccacaaccgattcc        |
| MT2A #39  | gaatcggttgtggactgagg        | agaggtgagaaccgtccctg        |
| MT2A #40  | agtacgccgtcccttgctc         | ctttgcattgcaggagcc          |
| MT2A #41  | cctctgtctttctccttgacg       | cttttctgcaggagggtc          |
| MT2A #42  | tcttgcagaaaagtaagtggg       | ccctgaggatggtggagag         |
| MT2A #43  | cctctacccttccctgtcc         | ctttaattcccctgaggatggtg     |
| PDE4B #1  | ttgcagctttactgctttg         | ttatcaatcaagccctcctg        |
| PDE4B #2  | ctgagccaggagggtctg          | cagctgctatgcaccaactc        |
| PDE4B #3  | acctcagtagagttggtgcatagc    | tttgaaacctcccattgacg        |
| PDE4B #4  | attttctgccccattgacg         | tttactagacaccctggactgg      |
| PDE4B #5  | aggggtgctagtaaacctgcac      | taacagccacctctttggag        |
| PDE4B #6  | catagcccactctcactcc         | ttcagtaaaggagaaaacatctgc    |
| PDE4B #7  | aatgggcagatgttttctcc        | ttcctgtctgaggctttcc         |
| PDE4B #8  | atccagaaatgtgggaaagc        | atgtggctcattgtatataatctg    |
| PDE4B #9  | gaattgcgtaagccctctg         | tgagaactttggacaaatgtgg      |
| PDE4B #10 | agttctcagatatcataacctgatcc  | aagaaagctgtttcccctgc        |
| PDE4B #11 | ggaatatctgaagcagaatgtgg     | gtgtgggaactgggtctgg         |
| PDE4B #12 | tggtactcgaaaaacattaatacc    | tgcttaagggaaacatttaacg      |
| PDE4B #13 | aaaacattaatacctcagctaaagtgc | ttgacaatatctgcttaagggaaac   |
| PDE4B #14 | ttgtcaaatataacaccctgctt     | aggcctcctcggtttcatt         |
| PDE4B #15 | ccctgcttattatggttatttcac    | aggcctcctcggtttcattc        |
| PDE4B #16 | tctttgaatgaaaccgaggag       | acacggaacggactcaactg        |
| PDE4B #17 | tgaacagttgagtcctgtcc        | ggtggatggtgttctcagc         |
| PDE4B #18 | ccgttccgtgttgactcc          | gcataactgaaatacttactaacatgc |
| PDE4B #19 | accctcccctgaaagtgg          | caatctatttaatgactccattgacg  |
| PDE4B #20 | cctcccctgaaagtgg            | gggagggccagcaatctat         |
| PDE4B #21 | cctcccagaggcaaatcg          | cccttctctggcttactgc         |
| PDE4B #22 | cagggacctagatacagacacg      | cagtataaacttttcccttctctg    |
| PDE4B #23 | aagccagagaaagggaaaag        | ccggaactaaaatgcaaaaag       |
| PDE4B #24 | ctgtagcagacctatctccaaac     | ttgagcctactgtaaccaaagag     |
| PDE4B #25 | aactttgaggagttggaacttttg    | taggtgcactccctcacctg        |
| PDE4B #26 | gtcatgagccccatcattaatac     | ggctatgtttctgccttttgag      |
| PDE4B #27 | atcacaggtgaggagtg           | acaggctatgtttctgccttttg     |
| PDE4B #28 | tcaaaaaggcagaaacatagcc      | ggaaaaaccccattaaatcacc      |
| PDE4B #29 | acatagcctgtggccttg          | catagaaagtaatgcaggaaaaacc   |
| PDE4B #30 | ggttttcctgcattacttctatg     | gttgtttggggaatgtgg          |
| PDE4B #31 | aataaatccacattccccaaaa      | tgatgaaaaaccaacccaaa        |
| PDE4B #32 | acagcatggcaaacagtgg         | ggaaatgatgaaaaaccaacc       |
| PDE4B #33 | ggttggttttcatcatttcc        | agttttcccatgtttatgttc       |
| PDE4B #34 | cctgctgcttcccatcac          | ccacaagtttcccatgtttatg      |
| PDE4B #35 | ttcacagtttgctattttgg        | agagtctgaccctgtgacc         |
| PDE4B #36 | cttgtggtcacaggggtcagg       | accccatccactgtctacc         |
| PDE4B #37 | caagtggatggggtcgtg          | ctttattacatgggctaagtctgtg   |
| PDE4B #38 | ttccaacatgaacacaatcctc      | cagtcaaaaatcggggtgaaaac     |
| PDE4B #39 | tgcttagactttgaacgtaatg      | ccatctcaaggagaaatgagg       |
| PDE4B #40 | gaaaagcaaatgagaaaaagc       | catcccagggttcttaggg         |

|           |                            |                            |
|-----------|----------------------------|----------------------------|
| PDE4B #41 | ctcagaaatgacatcacataccc    | tcctaaaactaaaggcagaagc     |
| PDE4B #42 | ggacacatttatgcagatgagc     | gtgtcggatctaccaagaaac      |
| PDE4B #43 | agatcaccgacacctcatcc       | aaatcacagtgggtctctgc       |
| PDE4B #44 | acttggcaccagccatcc         | ccttcctccagctctctcc        |
| PDE4B #45 | caccactgtgattgttctcc       | gattccgggtgactgaagg        |
| PDE4B #46 | gggggcacctcagtagc          | gctgtccatagcagagtcacc      |
| PDE4B #47 | agcggtgactctgctatgg        | ttctgcaacaacacacagc        |
| PDE4B #48 | atgcctgtgtgttgttgc         | cggtaggctgtatggctctagc     |
| PDE4B #49 | cgctggaggaattagactgg       | catctcactgacagaccggtg      |
| PDE4B #50 | tgagatggcttctaacaaggtaa    | agctccctgcatgatcaca        |
| PDE4B #51 | agctccagctccccctac         | agagttggtagcattccctggt     |
| PDE4B #52 | agtgcaccagggaaatgctac      | gaatctctagacaaagcaacaac    |
| PDE4B #53 | cagagtgcaccagggaaatg       | tgctgtagcatcaagacacaag     |
| PDE4B #54 | cacactctactgtgtctgtatgc    | ggaaattgaagcgtactgagg      |
| PDE4B #55 | tgctacagcaaaagtttaaatcc    | cacctaaacctattccaaactgc    |
| <br>      |                            |                            |
| RPL19 #1  | tgcgcatgtctagtaggaagtc     | tgataaaagtcaaatatcagaaatcg |
| RPL19 #2  | tttaaaaccgatttctgatattgac  | ttcatctctgccacactaaactc    |
| RPL19 #3  | aggcctatatggaggctatgag     | accctgctccaatttcgctc       |
| RPL19 #4  | aagaaccggacaggaatacg       | agcagcgaaggaaagagc         |
| RPL19 #5  | ttcgcagataatgggaggag       | gtcagcgcctgatggagac        |
| RPL19 #6  | gtgagggcgagctggtct         | caagaccgacagtcctgt         |
| RPL19 #7  | gacaagggactgctggtctt       | ttagggcggcctccattt         |
| RPL19 #8  | ggttgggggagatgaaatg        | aaagtgtccggcctacc          |
| RPL19 #9  | ggtaggccggagcacttcc        | ggcagactttctggtctc         |
| RPL19 #10 | ctgagaccaggaaaagtctgc      | gtctgttcgctccggttg         |
| RPL19 #11 | cacgcgagcagagcaaac         | ggtgtccaagcaagaaag         |
| RPL19 #12 | cctttctgcttggcacac         | taggcttgcctacatcacg        |
| RPL19 #13 | cacgtgatgtagggcaagc        | agaggccaaaggagtgaatg       |
| RPL19 #14 | ctccgactgccgagagag         | ggctattcgagagatttcc        |
| RPL19 #15 | atctctgccaatagccgaac       | agtctaggaatgcaggcaag       |
| RPL19 #16 | ttactgtgataaaacagggaaataag | agtctaggaatgcaggcaag       |
| RPL19 #17 | aactgacctgattcctagac       | gggggttatgccatttctg        |
| RPL19 #18 | aaacgctgagtaccagaaatgg     | ggaaagtcaagccaaggac        |
| RPL19 #19 | acgctgagtaccagaaatgg       | acgctatgccttcacctctc       |
| RPL19 #20 | tccagaggagaaatgcgaac       | taaggctctgggctatgcag       |
| RPL19 #21 | gcatagcgtgggtttgaag        | cacagccgcgaaataagac        |
| RPL19 #22 | agtctatttcgaggctgtg        | aatcctgggcaagaatgaac       |
| RPL19 #23 | acaaagggcaggctctgtatg      | tgagcatactagacacacagaaaac  |
